# Supplementary material for: Essentiality of the Escherichia coli YgfZ Protein for the In Vivo Thiomethylation of Ribosomal Protein S12 by the RimO Enzyme
Source: MDPI journal article supplement (doi:10.3390/ijms24054728), 2023-03-01
Supplement: s1 [file s1]

## Supplementary

### Essentiality of the *Escherichia coli* YgfZ protein for the in vivo thio-methylation of ribosomal protein S12 by the RimO enzyme.

Torben Lund, Maria Yohanna Kulkova, Rosa Jersie-Christensen, and Tove Atlung\*

Department of Science and Environment, Roskilde University, Denmark

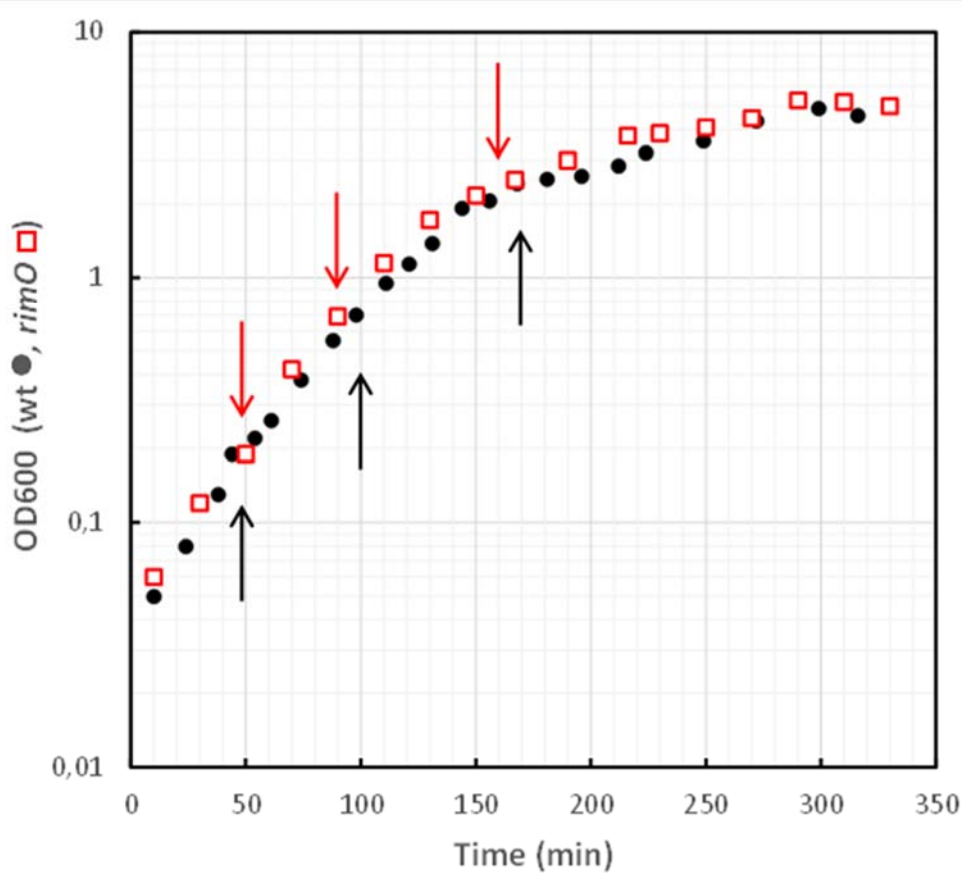

**Figure S1.** Bacterial strains TC5540 (wt) and TC5541 (*rimO*) were grown in LB medium at 37 °C. Samples were taken for MS analysis at the points indicated by arrows, at OD600 of 0.2, 0.7 and 2.5 and processed as described in the experimental section.

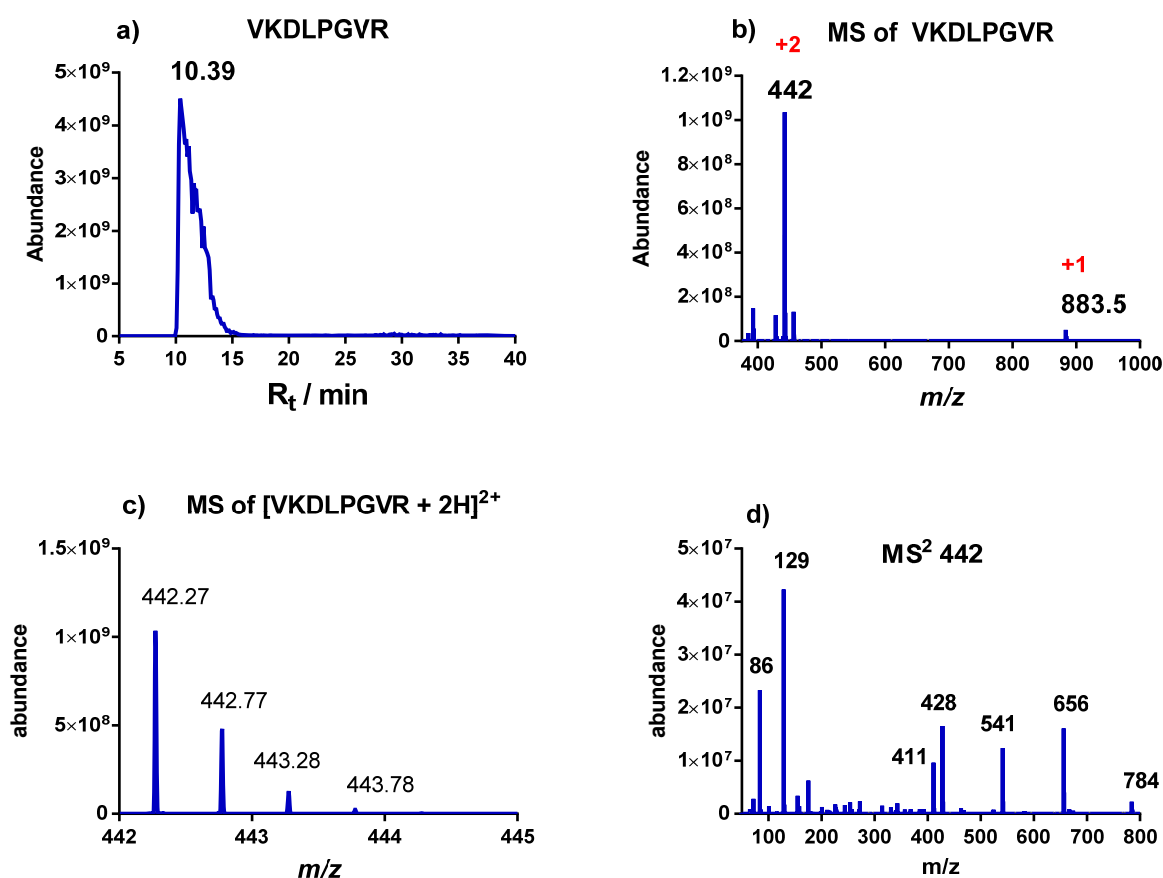

**Figure S2:** Commercially purchased non-thiomethylated VKDLPGVR used as a standard reference. a) HPLC chromatogram a sample of VKDLPGVR with observed retention time of the peptide peak at 10.39 min. b) ESI-MS spectra of VKDLPGVR showing the single and double charged ions of the peptide . c) Illustrates the  $^{13}C$  isotope distribution (mass difference of 1/2) that proves double charge ion (+2) state. d) Chromatogram shows the MS<sup>2</sup> of  $m/z$  =442. The following fragment ions are observed: 129 (iminium ion of R), 428 (y4), 541 (y5), 656 (y6).

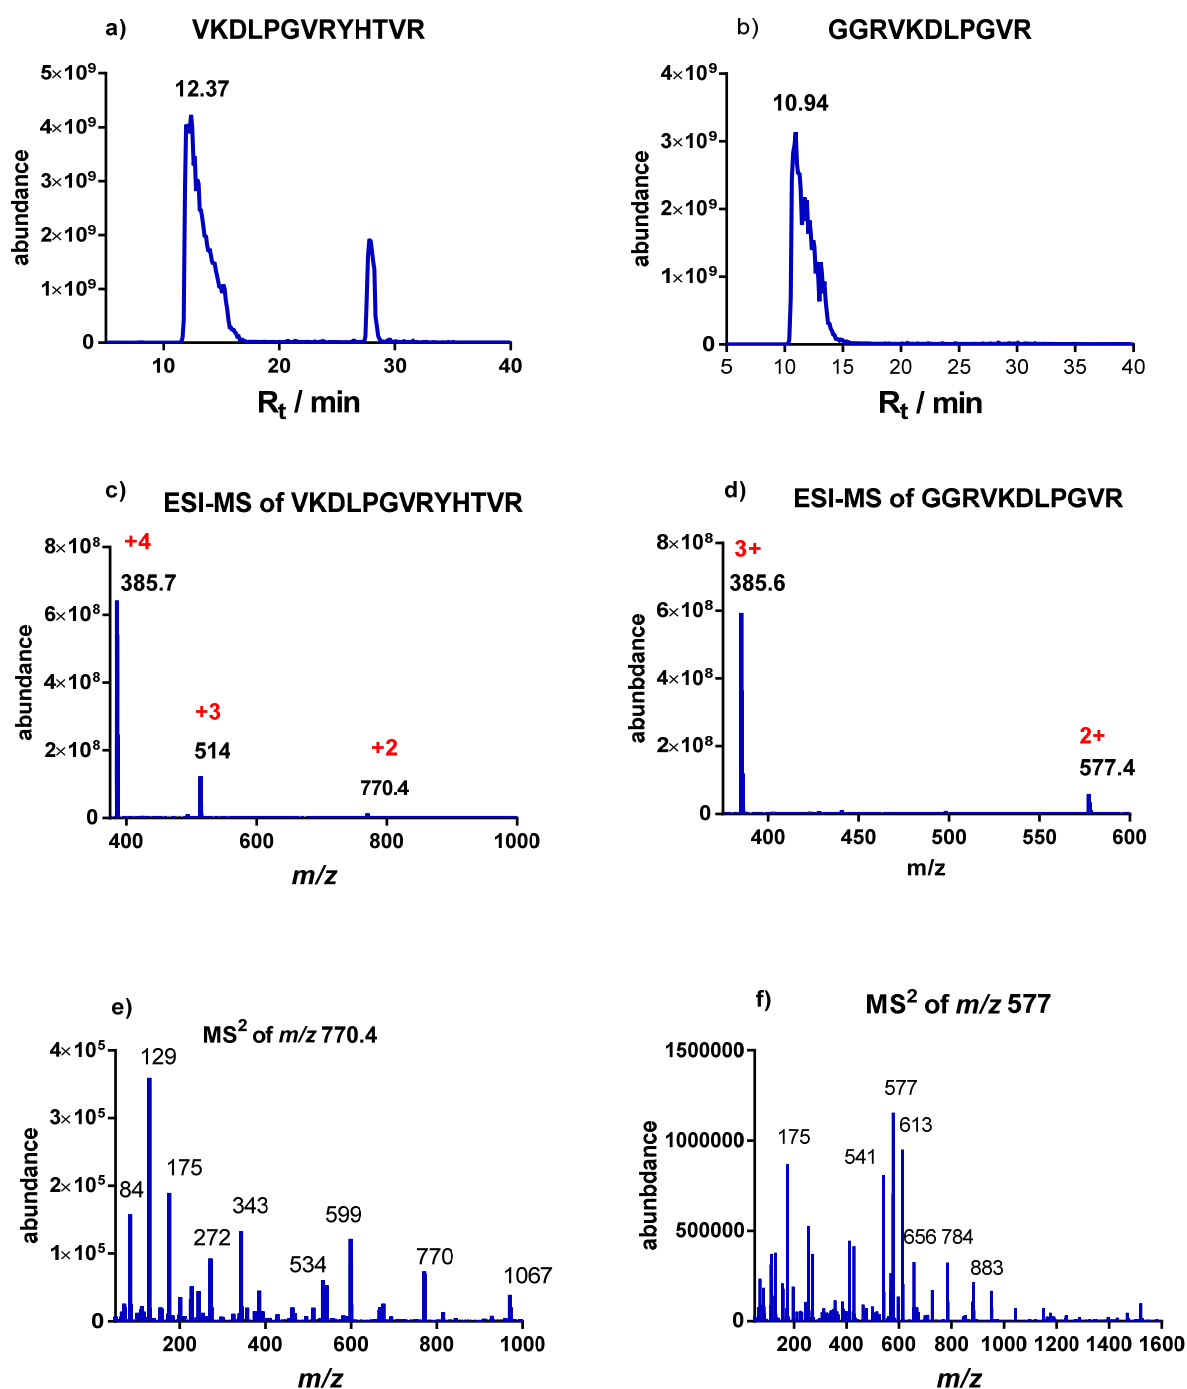

**Figure S3:** Commercially purchased non-thiomethylated two miscleaved S12 peptides containing D88. a), b) HPLC chromatograms of the two peptides VKDLPGVRYHTVR and GGRVKDLPGVR c),d) ESI-MS spectra of the two peptides. e), f)  $MS^2$  of the double charged ions  $[M+2H]^{2+}$  of the two reference peptides.

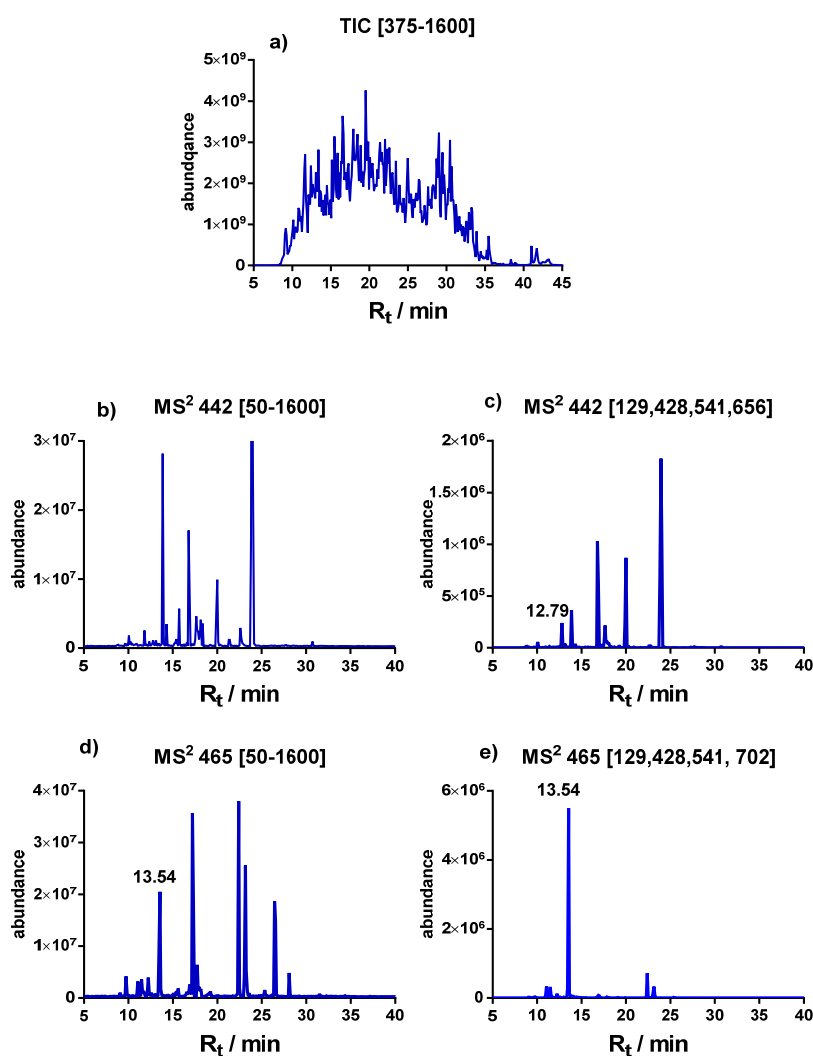

**Figure S4** Targeted LC-MS analysis of a trypsin treated wild type bacterial *E. coli* sample. a) Total Ion Chromatogram (TIC) in the  $m/z$  interval [375-1600]. b),c) Chromatograms of the non thiomethylated VKDLPGVR peptide sample with the MS<sup>2</sup> filters, MS<sup>2</sup> 442.27@hcd 35 [50-1600] and MS<sup>2</sup> 442.27@hcd 35 [129,428,541,656], respectively. d), e) Chromatograms obtained of the thiomethylated VK**D**LPGVR peptide with the MS<sup>2</sup> filters, MS<sup>2</sup> 442.27@hcd 35 [50-1600]MS<sup>2</sup> 465.26@hcd 35 [129, 428, 541,702], respectively.

**Table S1:** Percent S12 thiomethylation in wild type (wt), *rimO* and *ygfZ* bacterial strains grown at 30-42 °C and harvested at different bacterial growth phases.

| Bacterial strain | Geno-type | OD <sub>600</sub> | t/°C | Biological Replicates | Area VKDLPGVR | Area VKDLPGVR | $\frac{VKDLPGVR}{VKDLPGVR}$ |
|------------------|-----------|-------------------|------|-----------------------|---------------|---------------|-----------------------------|
| TC5540           | wt        | 0.2               | 37   | A                     | 9.63E06       | 8.52E05       | 11.3                        |
|                  |           |                   |      | B                     | 3.45E07       | 1.48E06       | 23.3                        |
|                  |           |                   |      | C                     | 2.68E07       | 1.07E06       | 24.9                        |
| “                | “         | 0.7               | 37   | A                     | 3.36E07       | 1.30E06       | 25.9                        |
|                  |           |                   |      | B                     | 2.59E07       | 5.05E05       | 51.0                        |
|                  |           |                   |      | C                     | 1.76E07       | 1.08E06       | 16.3                        |
| “                | “         | 2.5               | 37   | A                     | 1.50E07       | 2.54E05       | 59.0                        |
|                  |           |                   |      | B                     | 1.21E07       | 0             | -                           |
|                  |           |                   |      | C                     | 2.00E07       | 2.25E05       | 88.7                        |
| TC5542           | RimO      | 0.2               | 37   | A                     | 0             | 1.76E07       | 0.0                         |
|                  |           |                   |      | B                     | 0             | 2.14E07       | 0.0                         |
|                  |           |                   |      | C                     | 0             | 1.62E07       | 0.0                         |
| “                | “         | 0.7               | 37   | A                     | 0             | 2.07E07       | 0.0                         |
|                  |           |                   |      | B                     | 0             | 1.51E07       | 0.0                         |
| “                | “         | 2.5               | 37   | A                     | 0             | 4.81E06       | 0.0                         |
|                  |           |                   |      | B                     | 0             | 3.86E06       | 0.0                         |
|                  |           |                   |      | C                     | 0             | 3.24E06       | 0.0                         |
| TC5540           | wt        | 0.2               | 30   | A                     | 1.96E07       | 8.63E05       | 22.7                        |
|                  |           |                   |      | B                     | 3.98E07       | 2.14E06       | 18.6                        |
|                  |           |                   |      | C                     | 2.91E07       | 4.57E05       | 63.8                        |
| “                | “         | 0.2               | 42   | A                     | 1.66E07       | 1.36E06       | 12.3                        |
|                  |           |                   |      | B                     | 1.77E07       | 3.98E05       | 44.4                        |
|                  |           |                   |      | C                     | 2.91E07       | 4.57E05       | 63.8                        |
| TC5541           | ygfZ      | 0.2               | 30   | A                     | 2.16E05       | 1.17E07       | 0.0                         |
|                  |           |                   |      | B                     | 1.40E05       | 1.71E07       | 0.0                         |
|                  |           |                   |      | C                     | 0             | 7.51E06       | 0.1                         |
|                  |           |                   |      | D                     | 0             | 1.26E07       | 0.0                         |
|                  |           |                   |      | E                     | 0             | 1.34E07       | 0.0                         |
|                  |           |                   |      | G                     | 4.37E05       | 7.23E06       | 0.1                         |
| TC5541           | ygfZ      | 0.2               | 42   | A                     | 7.86E05       | 1.55E07       | 0.1                         |
|                  |           |                   |      | B                     | 6.58E05       | 1.50E07       | 0.0                         |
|                  |           |                   |      | C                     | 9.04E05       | 1.40E07       | 0.1                         |
|                  |           |                   |      | D                     | 0             | 1.47E07       | 0.0                         |
|                  |           |                   |      | E                     | 1.49E04       | 1.37E07       | 0.0                         |
|                  |           |                   |      | G                     | 0             | 9.47E06       | 0.0                         |
